# Supplementary material
Source: publisher figshare collection journal article supplement (https://springernature.figshare.com/ndownloader/files/27537709)
Supplement: Supplementary file 1 [file 27537709]

Archive with 9 entries (9 files):
- Additional File 2 correctedR2.pdf
- TABLE S1 CORRECTEDR2.xlsx
- FIGURE S1.pdf
- FIGURE S2.pptx
- FIGURE S3.pptx
- FIGURE S4.pptx
- Figure S5.pdf
- FIGURE S6.pptx
- FIGURE S7.pptx
