# Supplementary material
Source: publisher figshare collection journal article supplement (https://springernature.figshare.com/ndownloader/files/27537709)
Supplement: Supplementary file 1 [file 27537709 › FIGURE S1.pdf]

|   | 1                              | 2                                  | 3 | 4 | 5 | 6 | 7 | 8 | 9                        | 10                   | 11         | 12 |
|---|--------------------------------|------------------------------------|---|---|---|---|---|---|--------------------------|----------------------|------------|----|
| A | <b>BL</b>                      | Lovastatin – Highest concentration |   |   |   |   |   |   | Dose response Lovastatin | Dose response Drug B | Cells only |    |
| B | Drug B – Highest concentration |                                    |   |   |   |   |   |   |                          |                      |            |    |
| C |                                |                                    |   |   |   |   |   |   |                          |                      |            |    |
| D |                                |                                    |   |   |   |   |   |   |                          |                      |            |    |
| E |                                |                                    |   |   |   |   |   |   |                          |                      |            |    |
| F |                                |                                    |   |   |   |   |   |   |                          |                      |            |    |
| G |                                |                                    |   |   |   |   |   |   |                          |                      |            |    |
| H |                                |                                    |   |   |   |   |   |   |                          |                      |            |    |

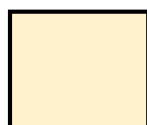

49 unique combinations of [Lovastatin] and [Drug B]
