# Supplementary material
Source: publisher figshare collection journal article supplement (https://springernature.figshare.com/ndownloader/files/27537709)
Supplement: Supplementary file 1 [file 27537709 › TABLE S1 CORRECTEDR2.xlsx]

## Sheet: Sheet1
	Cisplatin		Cyclophosphamide		Doxorubicin		Epothilone		Etoposide		5-Fluorouracil		Gemcitabine		Methotrexate		Rapamycin		Tamoxifen
	DAY 2	DAY 3	DAY 2	DAY 3	DAY 2	DAY 3	DAY 2	DAY 3	DAY 2	DAY 3	DAY 2	DAY 3	DAY 2	DAY 3	DAY 2	DAY 3	DAY 2	DAY 3	DAY 2	DAY 3
SYN_MAX	13.8948	15.6979	18.5934	6.50476	23.2789	19.9531	12.3384	11.3425	12.3384	5.60276	11.9521	10.3737	18.7955	17.3681	17.9469	18.3916	31.6804	41.2162	53.5988	48.7771
SYN_SUM	0.633219	0.28836	1.06361	0.0828761	5.7128	3.94707	0.874773	2.6549	0.165931	0.0647343	0.839193	0.403413	2.50823	0.957177	4.64005	3.37336	4.87021	16.9268	10.6481	13.3488
SYN_SUM_WEIGHTED	0.292124	0.13584	0.51284	0.0454372	2.59164	1.90346	0.140623	1.05235	0.0391642	0.0235061	0.346193	0.18098	1.18071	0.434694	2.69759	1.92488	3.65412	11.9226	7.73419	10.6761
SYN_SPREAD	0.213477	0.135534	0.239173	0.112875	0.495385	0.444766	0.266267	0.483804	0.115967	0.10749	0.264977	0.197201	0.365306	0.234758	0.508472	0.428274	0.392084	0.640846	0.445716	0.523134
SYN_AVERAGE_C1	25.0095	22.6143	22.901	17.4258	42.265	39.0239	17.1824	56.6683	13.2001	15.0771	22.992	20.8639	43.5448	70.5536	37.3447	33.3782	63.3852	50.7806	30.6278	32.1883
SYN_AVERAGE_C2	70.6234	60.4407	342.212	420	104.189	107.624	2.71196	3.30358	0.254378	1.4	0.775574	0.977825	52.5572	30.1488	12.2836	11.7356	0.576241	0.810092	54.3444	71.1106
ANT_MAX	-45.256	-35.0161	-24.5551	-36.0242	-10.3827	-16.8595	-22.6964	-24.3569	-31.2789	-33.2318	-12.8184	-14.3406	-39.1503	-35.0159	-13.467	-31.981	-15.5627	-16.6465	-25.5473	-21.4291
ANT_SUM	-2.96823	-3.84128	-4.01233	-8.554	-0.287491	-0.665833	-3.03821	-2.09937	-7.684	-10.4493	-1.68116	-3.78327	-2.69293	-2.70105	-1.68986	-4.48321	-2.59062	-0.353551	-1.29282	-3.23353
ANT_SUM_WEIGHTED	-1.90016	-2.4064	-2.80985	-5.71491	-0.216711	-0.448925	-2.27705	-1.56647	-5.83905	-7.88785	-1.14872	-2.51805	-1.69708	-1.33742	-0.598408	-1.85141	-0.965925	-0.185611	-0.23756	-2.01991
ANT_SPREAD	0.256101	0.331211	0.404229	0.48729	0.166402	0.198728	0.365873	0.293585	0.495642	0.560746	0.36215	0.51363	0.262268	0.277737	0.354234	0.374411	0.407999	0.145735	0.224956	0.388451
ANT_AVERAGE_C1	49.5339	42.2805	47.763	42.1437	21.2796	31.3482	53.9769	22.5773	51.5357	44.9247	39.2743	42.1711	32.6757	41.8913	41.4547	53.1602	18.126	13.367	52.2185	44.4846
ANT_AVERAGE_C2	39.4406	36.3692	117.897	142.829	33.8854	48.3075	3.77513	3.62249	0.425739	0.421082	0.297557	0.302452	42.7852	59.3765	51.8754	45.1034	1.33442	2.00465	98.9806	38.7729
SUM_SYN_ANT	-2.33501	-3.55292	-2.94872	-8.47112	5.42531	3.28123	-2.16344	0.555533	-7.51807	-10.3845	-0.841969	-3.37985	-0.184707	-1.74387	2.95019	-1.10984	2.27959	16.5733	9.35526	10.1153
SUM_SYN_ANT_WEIGHTED	-1.60804	-2.27056	-2.29701	-5.66948	2.37493	1.45454	-2.13642	-0.514124	-5.79988	-7.86435	-0.80253	-2.33707	-0.516371	-0.902723	2.09919	0.0734669	2.6882	11.737	7.49662	8.65617
