# Supplementary material
Source: publisher figshare collection journal article supplement (https://springernature.figshare.com/ndownloader/files/27537709)

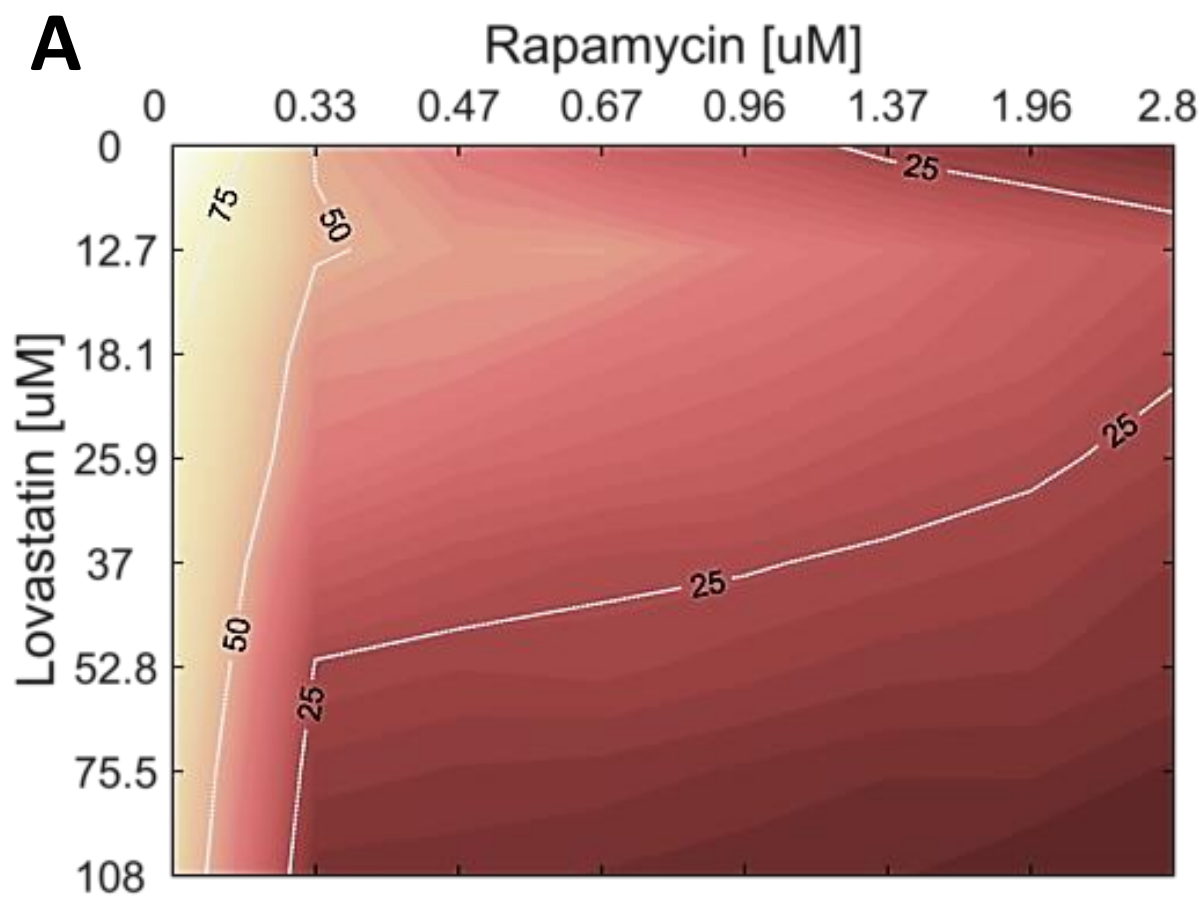

**Lovastatin and Rapamycin Day 2**

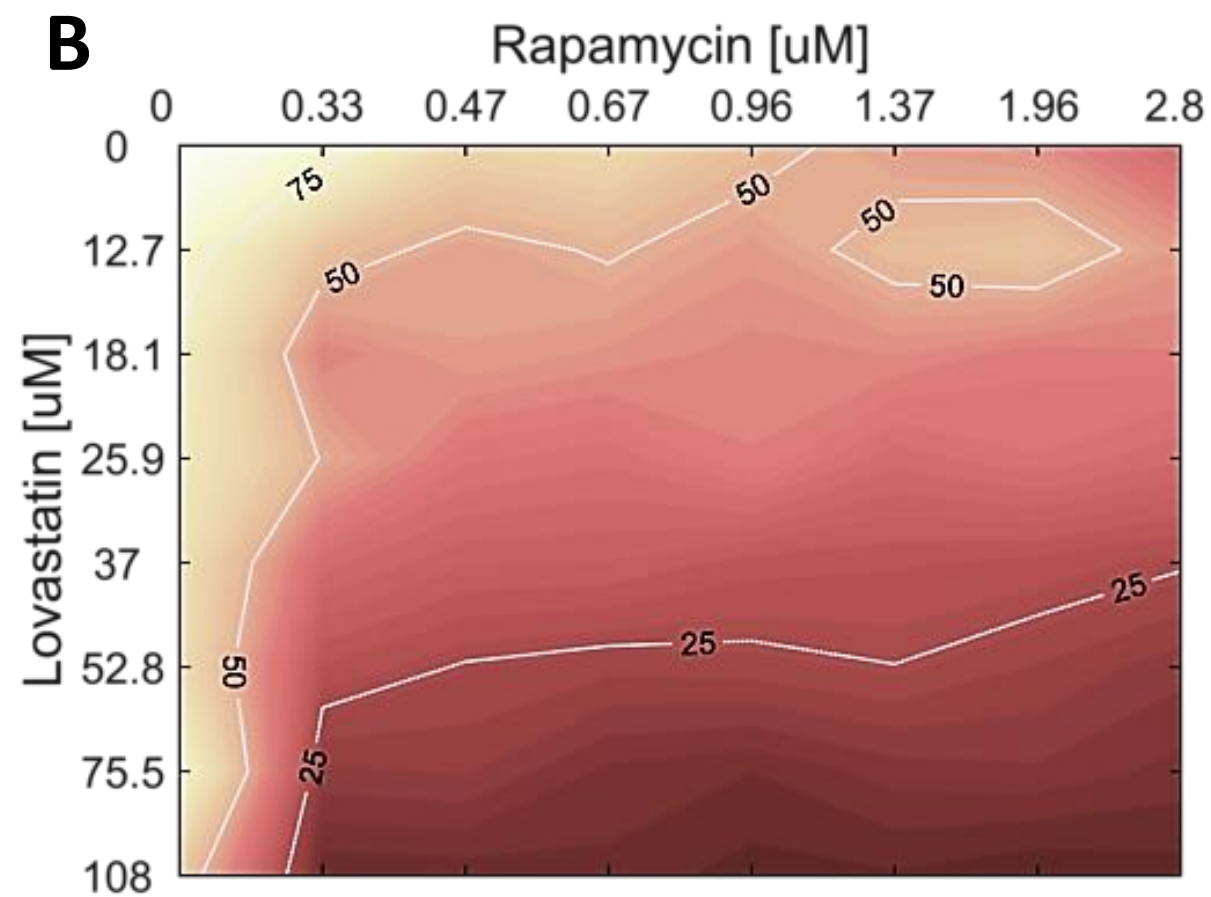

**Lovastatin Versus Rapamycin Day 3**

Supplement: Supplementary file 1 [file 27537709 › Figure S5.pdf]
